# Supplementary material for: Effect of Pulsed Electric Fields on the Lipidomic Profile of Lipid Extracted from Hoki Fish Male Gonad
Source: MDPI journal article supplement (doi:10.3390/foods11040610), 2022-02-21
Supplement: s1 [file s1]

# Supplementary Materials

**Table S1.** Assignment of individual phospholipid spectra in the  $^{31}\text{P}$ -NMR analysis of total lipid extracted from HMG.

| Phospholipids                              | Number of phosphorus | Chemical shift (ppm) |
|--------------------------------------------|----------------------|----------------------|
| PA - phosphatidic acid                     | 1                    | 3.1                  |
| LDPG - lyso-diphosphatidylglycerol         | 1                    | 0.34                 |
| CL - cardiolipin                           | 2                    | 0.13                 |
| LPSP - lyso-phosphatidylserine-plasmalogen | 1                    | -0.09                |
| SM - sphingomyelin                         | 1                    | -0.23                |
| PE - phosphatidylethanolamine              | 1                    | -0.29                |
| LPC - lyso-phosphatidylcholine             | 1                    | -0.38                |
| PS - phosphatidylserine                    | 1                    | -0.52                |
| PI - phosphatidylinositol                  | 1                    | -0.72                |
| PC - phosphatidylcholine                   | 1                    | -0.87                |

Assignment of individual phospholipid spectra was made relative to PC at -0.87. The  $^{31}\text{P}$ -NMR analysis was conducted in a  $\text{D}_2\text{O}$  based detergent system, pH 7.4.

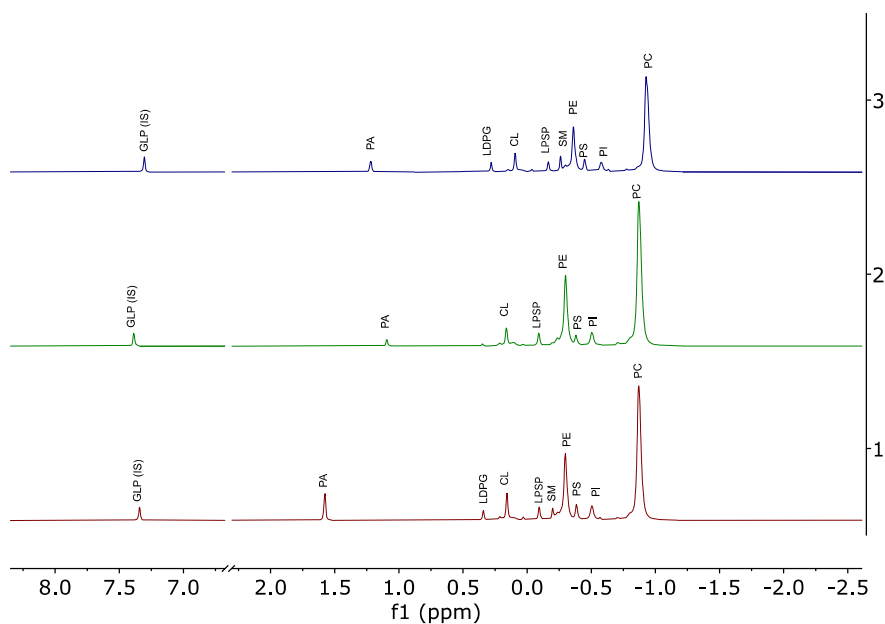

**Figure S1.**  $^{31}\text{P}$  NMR spectra of phospholipid profile for un-heated control, heat-treated control, and PEF treated (50 Hz, 1.25 kV/cm) HMG. 1 = PEF treated, 2 = heat-treated, 3 = un-heated control.
